# Supplementary material
Source: PubMed Central journal article supplement (PMC3288720)
Supplement: NIHMS354954-supplement-01.pdf [file NIHMS354954-supplement-01.pdf]

**Table S1. Parameters of multiple regression models for signaling pathway analysis.**

| TF    | Variable               | Coefficient | Standard Error | t-value   | Adjusted p-value |
|-------|------------------------|-------------|----------------|-----------|------------------|
| AP1   | R <sup>2</sup> =0.3942 |             |                |           |                  |
|       | 10A.ErbB2              | -4.79E-03   | 4.14E-03       | -1.16E+00 | 2.69E-01         |
|       | 231                    | -3.75E-02   | 4.21E-03       | -8.91E+00 | 5.56E-16         |
|       | RGD                    | -1.82E-02   | 5.57E-03       | -3.26E+00 | 1.81E-03         |
|       | YIGSR                  | -2.98E-05   | 5.49E-03       | -5.42E-03 | 9.96E-01         |
|       | Time                   | 9.06E-03    | 1.81E-03       | 5.00E+00  | 2.51E-06         |
|       | Time <sup>2</sup>      | -9.16E-04   | 1.58E-04       | -5.79E+00 | 6.22E-08         |
|       | 10A.ErbB2:RGD          | 2.34E-02    | 7.34E-03       | 3.19E+00  | 2.21E-03         |
|       | 231:RGD                | 2.47E-02    | 7.34E-03       | 3.37E+00  | 1.34E-03         |
|       | YIGSR:Time             | 2.47E-03    | 8.89E-04       | 2.78E+00  | 7.36E-03         |
| CREB  | R <sup>2</sup> =0.3054 |             |                |           |                  |
|       | 10A.ErbB2              | 1.43E-02    | 3.17E-03       | 4.52E+00  | 1.92E-05         |
|       | 231                    | 2.02E-02    | 4.55E-03       | 4.44E+00  | 2.55E-05         |
|       | RGD                    | -7.57E-03   | 3.16E-03       | -2.40E+00 | 2.03E-02         |
|       | YIGSR                  | 4.08E-03    | 3.14E-03       | 1.30E+00  | 2.17E-01         |
|       | Time                   | 6.98E-03    | 1.41E-03       | 4.95E+00  | 2.84E-06         |
|       | Time <sup>2</sup>      | -4.86E-04   | 1.23E-04       | -3.95E+00 | 1.68E-04         |
|       | 10A.ErbB2:YIGSR        | -2.05E-02   | 5.01E-03       | -4.09E+00 | 1.01E-04         |
|       | 231:RGD                | 2.55E-02    | 4.97E-03       | 5.14E+00  | 1.29E-06         |
|       | 231:Time               | -5.95E-03   | 6.79E-04       | -8.76E+00 | 9.34E-16         |
| STAT1 | R <sup>2</sup> =0.5961 |             |                |           |                  |
|       | 10A.ErbB2              | 2.53E-02    | 6.55E-03       | 3.86E+00  | 2.29E-04         |
|       | 231                    | 2.34E-02    | 7.78E-03       | 3.01E+00  | 3.79E-03         |
|       | RGD                    | 1.23E-02    | 4.58E-03       | 2.68E+00  | 9.38E-03         |
|       | YIGSR                  | -2.56E-02   | 4.52E-03       | -5.67E+00 | 1.09E-07         |
|       | Time                   | 4.27E-04    | 8.19E-04       | 5.22E-01  | 6.35E-01         |
|       | 231:RGD                | 4.58E-02    | 7.71E-03       | 5.94E+00  | 3.18E-08         |
|       | 231:YIGSR              | 4.48E-02    | 7.72E-03       | 5.81E+00  | 6.09E-08         |
|       | 10A.ErbB2:Time         | 3.44E-03    | 1.15E-03       | 2.99E+00  | 3.98E-03         |
|       | 231:Time               | -8.46E-03   | 1.11E-03       | -7.60E+00 | 2.44E-12         |
| STAT3 | R <sup>2</sup> =0.4556 |             |                |           |                  |
|       | 10A.ErbB2              | -1.33E-02   | 7.11E-03       | -1.87E+00 | 7.14E-02         |
|       | 231                    | 4.68E-02    | 7.00E-03       | 6.69E+00  | 4.81E-10         |
|       | RGD                    | -2.36E-02   | 5.56E-03       | -4.24E+00 | 5.88E-05         |
|       | Time                   | 1.37E-04    | 8.15E-04       | 1.68E-01  | 8.89E-01         |
|       | 10A.ErbB2:RGD          | 4.49E-02    | 7.99E-03       | 5.62E+00  | 1.19E-07         |
|       | 231:RGD                | 5.75E-02    | 7.79E-03       | 7.37E+00  | 7.82E-12         |
|       | 10A.ErbB2:Time         | 3.84E-03    | 1.16E-03       | 3.31E+00  | 1.56E-03         |
|       | 231:Time               | -4.47E-03   | 1.11E-03       | -4.01E+00 | 1.37E-04         |
